# Supplementary material
Source: PubMed Central journal article supplement (PMC1413725)

**PBS**

**LPS**

**OVA**

**OVA+LPS**

**+/+**

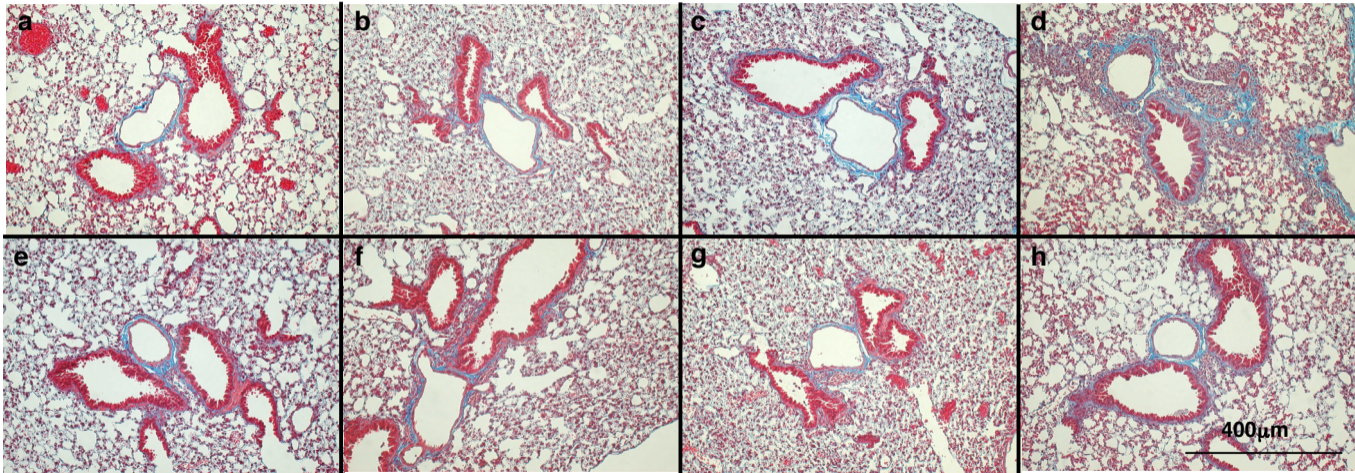

400 μm

Masson Trichrome stain X100

Supplement: pnas_0510685103_5.pdf [file pnas_0510685103_5.pdf]

**PBS**

**LPS**

**OVA**

**OVA+LPS**

**W/W<sup>v</sup>**

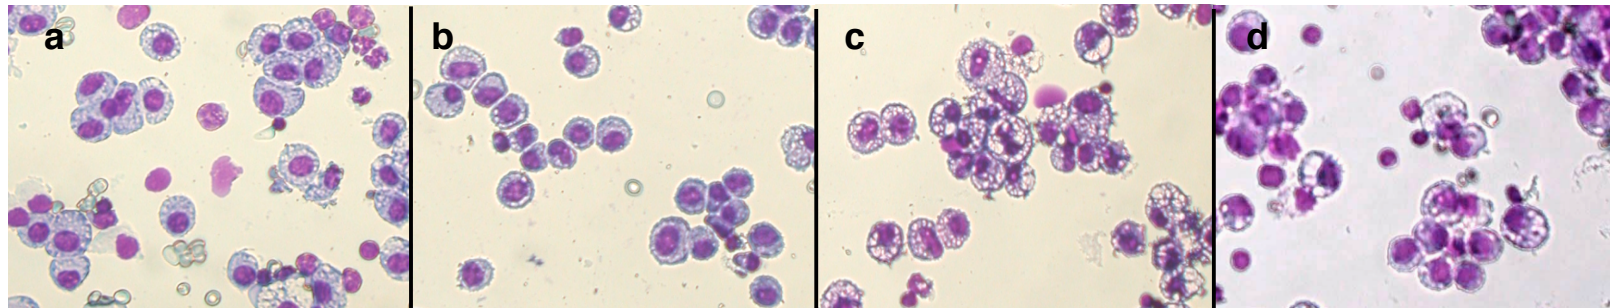

**W/W<sup>v</sup>  
+  
+/+  
BMMCs**

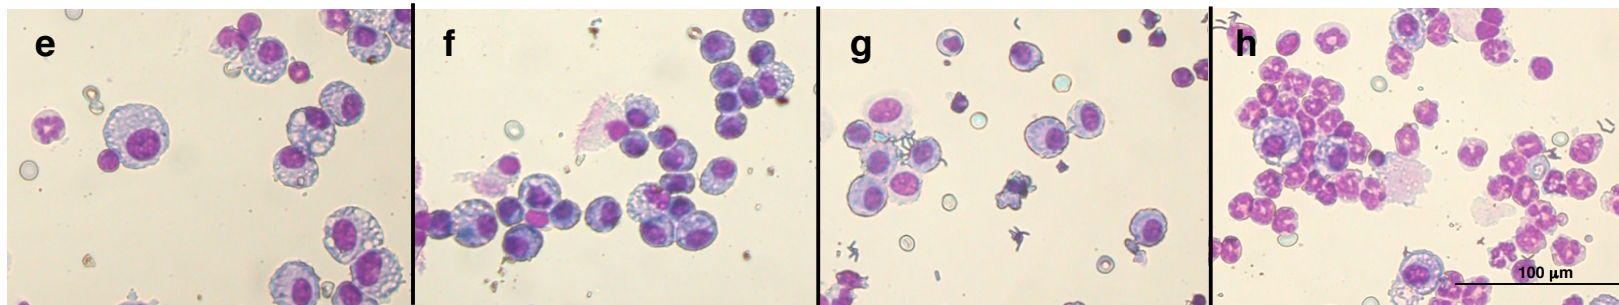

**May-Giemsa stain ×400**

Supplement: pnas_0510685103_6.pdf [file pnas_0510685103_6.pdf]

**OVA**

**OVA+LPS**

**WT**

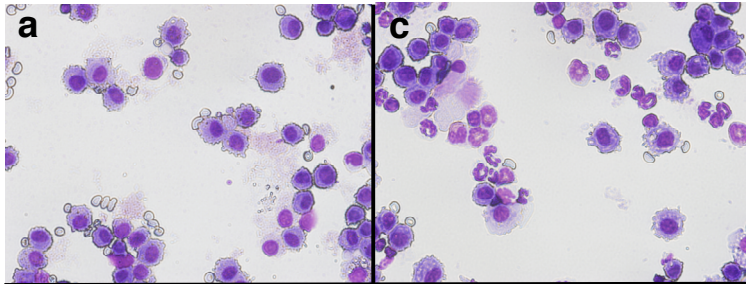

**TLR4 KO**

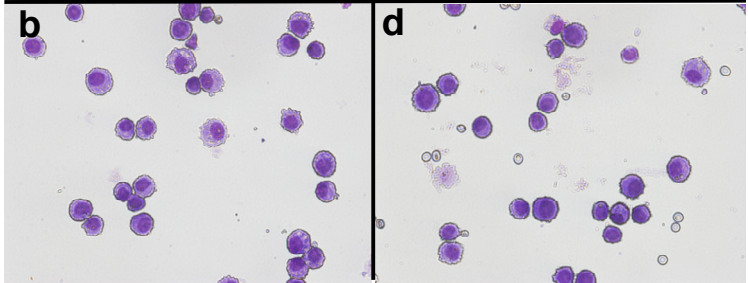

**May-Giemsa stain ×400**

Supplement: pnas_0510685103_9.pdf [file pnas_0510685103_9.pdf]
